# Supplementary material for: A thermosensitive hydroxybutyl chitosan hydrogel as a potential co-delivery matrix for drugs on keloid inhibition
Source: Royal Society of Chemistry journal article supplement (doi:10.1039/c6tb00378h), 2016-01-01
Supplement: c6tb00378h1.pdf [file c6tb00378h1.pdf]

## ELECTRONIC SUPPLEMENTARY INFORMATION

### A thermosensitive hydroxybutyl chitosan hydrogel as a potential co-delivery matrix for drugs on keloid inhibition

Zixian Bao,<sup>a</sup> Ping Gao,<sup>a</sup> Guixue Xia,<sup>a</sup> Zhiguo Wang,<sup>b</sup> Ming Kong,<sup>a</sup> Chao Feng,<sup>a</sup> Xiaojie Cheng,<sup>\*a</sup> Ya Liu<sup>\*a</sup> and Xiguang Chen<sup>\*a</sup>

<sup>a</sup> College of Marine Life Science, Ocean University of China, 5# Yushan Road, Qingdao 266003, Shandong Province, China.

<sup>b</sup> Department of Plastic Surgery, The Affiliated Hospital of Medical College Qingdao University, Qingdao 266013, Shandong Province, China.

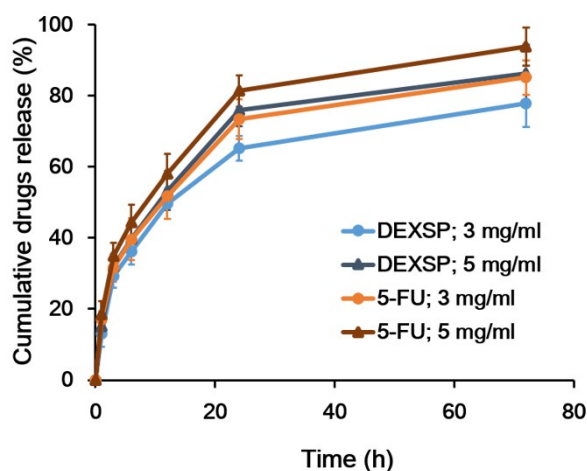

**Fig. S1** *In vitro* release profiles of 5-FU and DEXSP from HBC hydrogels in the PBS (pH = 6.0, 0.02M). The results were expressed as mean  $\pm$  SD ( $n = 3$ ).

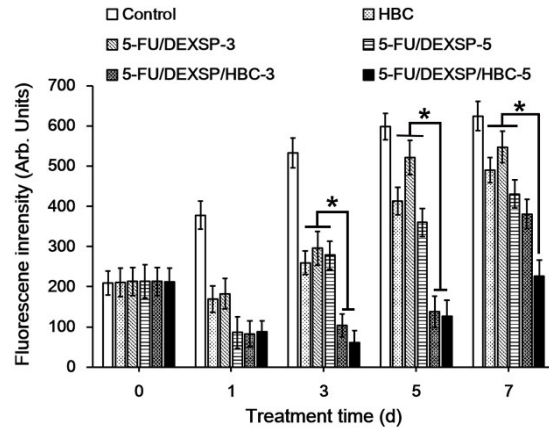

**Fig. S2** The fluorescence intensity of KFs treated with HBC hydrogel, 5-FU/DEXSP-3 solution, 5-FU/DEXSP-5 solution, 5-FU/DEXSP/HBC-3 hydrogel and 5-FU/DEXSP/HBC-5 hydrogel obtained by Alamar Blue assay. The results were expressed as mean  $\pm$  SD ( $n = 3$ , \*  $p < 0.05$ ).

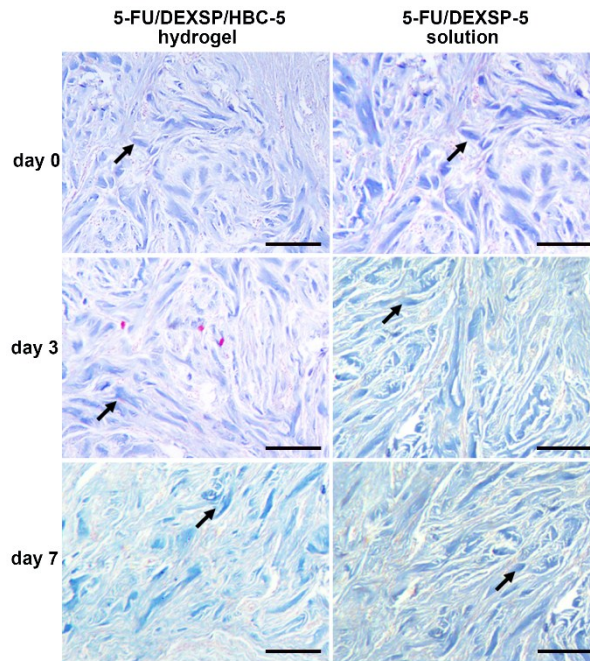

**Fig. S3** Masson's staining of keloid biopsies treated with 5-FU/DEXSP/HBC-5 hydrogel and 5-FU/DEXSP-5 solution on day 0, 3 and 7. The hyalinised collagen fibres were indicated with *black arrows*. Scale bar 100  $\mu$ m.
